# Supplementary material for: Outburst flood scenarios and risks for a rapidly growing high-mountain city: Pokhara, Nepal
Source: Copernicus journal article supplement (doi:10.5194/nhess-2022-64), 2022-03-03
Supplement: Supplementary file [file nhess-2022-64-AC1-supplement.pdf]

## Reply to Referee Comment #1 by Adam Emmer

### General Comments

#### *General Comment #1:*

The authors repeatedly mention that the city is threatened by an outburst floods, but (nowadays) there are no lakes which could burst located upstream in the Sabche cirque. Therefore, the reader may wonder what could be the source of such flooding?

This is a good point, although the potential for impacts from outburst flood can change rapidly if lakes were to be impounded by landslides or glacier surges in the future. For more details, please refer to our reply to General Comment #3.

I see a good argumentation with the 2012 flood, but it was also not an outburst flood according to the description provided by the authors (rather a highly mobile ice-rock avalanche which transformed into the hyper-concentrated flow; perhaps somewhat similar to the 2021 Chamoli disaster; [10.1126/science.abh4455](https://doi.org/10.1126/science.abh4455)).

We concur that the specific mechanism(s) of the 2012 “flood” remain(s) debated, if not elusive. Following this comment and also General Comment #4, we removed the term outburst flood when referring to the May 2012 flood and now draw some parallels to the 2021 Chamoli disaster (LL37ff of the original manuscript):

“Apart from annual monsoonal floods, this river has a history of rare, extreme floods. On May 5, 2012, a hyperconcentrated flow killed 72 persons and destroyed roads, bridges, and drinking water pipelines in the northern Pokhara valley (Gurung et al., 2015; Gurung et al., 2021). The exact sequence of events remains debated, but may have been initiated by rock-slope failures from the western flank of the Annapurna IV massif at 7,525 m a. s. l., observed by chance by a pilot (Hanisch et al., 2013; Kargel et al., 2013). Like in the 2021 Chamoli disaster (Shugar et al., 2021), a highly mobile ice-rock avalanche may have transformed into an hyperconcentrated flow that hit Kharapani village (1,100 m a.s.l.) some 23 km downstream just half an hour later, causing most of the damage and fatalities with an estimated peak discharge of  $8,400 \text{ m}^3 \text{ s}^{-1}$  (Hanisch et al., 2013; Oi et al., 2014; SANDRP, 2014). Thanks to the pilot, a radio warning was issued, most likely preventing a higher death toll further downstream (Kargel et al., 2013).”

#### *General Comment #2:*

Overall, the flood scenarios used are not well-justified and would benefit from better linkages to the past floods and potential future flood sources. For instance, why using 1,000 to 10,000  $\text{m}^3/\text{s}$  (1,000  $\text{m}^3/\text{s}$  step) and not e.g. 1,000 to 5,000  $\text{m}^3/\text{s}$  (500  $\text{m}^3/\text{s}$  step) if the 2012 flood corresponds to 3,700  $\text{m}^3/\text{s}$  in Kharapani. And it was likely less in Pokhara I guess – to put your flood scenarios in the context, could you also use HEC-RAS to estimate the 2012 peak in the city? If it was the largest recent flood, it could provide good guiding value for comparison and scenarios justification. Future

flood scenarios should be better connected to potential sources of these floods in my opinion.

Please refer to our reply to General Comment #3 concerning the linkages to future flood sources. We added more details about our choice of flood scenarios to section 3.1 (following LL99 of the original manuscript):

“We analyse potential flood impacts from physically plausible magnitudes of outburst floods along a 40-km long reach of the Seti Khola. Data to inform our range of scenarios come from two non-meteorological floods in the Pokhara valley, and have estimated peak discharges differing by orders of magnitude: while the May 2012 flood involved between 1,000 and 12,300 m<sup>3</sup> s<sup>-1</sup> (Kargel et al., 2013; Oi et al., 2012; SANDRP, 2014), much larger Medieval floods may have involved 45,000 to 600,000 m<sup>3</sup> s<sup>-1</sup> (Schwanghart et al., 2016), judging from geomorphic flood markers. Reported peak discharges from non-meteorological floods elsewhere in the Himalayas are 1,600 m<sup>3</sup> s<sup>-1</sup> for the Dig Tsho GLOF of 1985 (Vuichard and Zimmermann, 1987), 8,000 to 14,000 m<sup>3</sup> s<sup>-1</sup> for the 2021 Chamoli disaster (Pandey et al., 2022; Shugar et al., 2021), and provide further support for our range of historic flood scenarios.”

*General Comment #3:*

Possible flood sources are very briefly touched in only one paragraph of discussion section 5.2, but I'm convinced it deserves more attention. My suggestion to the authors is to elaborate bit more on the potential source(s) of their otherwise virtual flood scenarios (sub-glacial outburst (?), glacial surge-induced damming of the valley (?), outbursts of possibly landslide-dammed lakes (?), transformed ice-rock avalanche (?)). Could (some of) these processes lead to the impoundment / generation of enough water for 10,000 m<sup>3</sup>/s in the 30 km far city?

To motivate better our choice of scenarios, we move this paragraph from the Discussion to the Introduction (following LL44 of the original manuscript), and expanded it to:

“Even larger floods may have occurred in the Seti Khola in Medieval times, depositing much of the youngest sediment fill of the Pokhara valley during or shortly after large earthquakes, likely in the wake of major landslides or outbursts of glacier- and landslide-dammed lakes in the Annapurna Massif (Fort, 1987; Schwanghart et al., 2016; Stolle et al., 2017). Based on relict natural dams, Schwanghart et al. (2016) estimated that up to 1 km<sup>3</sup> of water could have been stored in the steep walled and sediment-filled Sabche Cirque some 35 km north of Pokhara city; outburst floods from this cirque could have released water at peak rates of up to 600,000 m<sup>3</sup> s<sup>-1</sup>. Several authors agree that the cirque might spawn large floods along the Seti Khola in the future (Fort, 2010; Grandin et al., 2012; Gurung et al., 2021; Kargel et al., 2013; Lovell et al., 2018). The upper Seti Khola gorge below the cirque is a bottleneck prone to blockage by landslides detaching from the cirque walls, and might impound large amounts of water (Kargel et al., 2013). Further downstream, landslides triggered by monsoonal storms (Talchabhadel et al., 2018) could also form temporary dams that might fail catastrophically like in the Melamchi outburst flood in June 2021 (Petley, 2021). Fort (1987) and Kargel et al. (2013) reported that the Sabche Cirque hosts large amounts of unconsolidated material to nourish floods and debris flows. Although not present currently, meltwater lakes could form and grow rapidly in the Sabche Cirque and may release GLOFs in the near future (Zheng et al., 2021). The

Sabche glacier could also contribute to generating outburst floods in the future as its surges could form potentially unstable ice-dammed lakes (Lovell et al., 2018). Despite this evidence of past non-meteorological floods along the Seti Khola, appraisals of flood hazard have so far largely focused on the 100-year meteorological flood as estimated from rainfall data (Basnet and Acharya, 2019; Gurung et al., 2021)."

*General Comment #4:*

The latter seems the most likely to me (also in the light of the 2012 event), but than it is not an 'outburst'. And so I suggest to re-consider and check the use of the word 'outburst' in this context as it could be terminologically misleading (similarly, the use of the word 'risk'). Considering the actual content of the manuscript, my suggestion for possibly revised title would be '(Extreme) flood scenarios and exposed areas in a rapidly growing ... ', or similar.

We removed the term "outburst" when referring to the May 2012 flood and changed the title accordingly to the referee's suggestion to "Rare flood scenarios for a rapidly growing high-mountain city: Pokhara, Nepal".

Specific Comments - Text

*Specific Comment #1:*

L99-100: please provide more details on your field mapping of sediment traces; how was it integrated with the overall workflow (Fig. 2)?

Please also refer to our reply to Referee #2's General Comment #7 and their Specific Comment #4.

We mapped sediment traces from orthorectified RapidEye imagery and not in the field; we had stated this in LL162-164 originally: "We also recorded the extent of sediment deposited during the May 2012 flood along this 8.4-km long reach from orthorectified 5-m resolution RapidEye imagery of October 18, 2012." To better clarify our use of sediment traces of the May 2012 flood for model calibration, we now follow this sentence up with "We compared the simulated flood areas with the mapped extent of flood sediments and the mapped changes in buildings." We also added this calibration step to the Fig. 2 and added a similar workflow figure as supplementary material.

*Specific Comment #2:*

L107-108: I wonder what is the justification for using the steady flow HEC-RAS mode while it also offers unsteady flow mode which may be more suitable for this type of events characterised by limited though suddenly released total flood volume and substantial attenuation?

We agree with the referee that unsteady flow modelling might be more suitable to simulate outburst floods. However, we argue that essential data on the flood generating mechanisms in the Sabche Cirque are missing. This lack concerns initial breach characteristics (breach rate, breach depth, impounded water volume, etc.) that are crucial for empirically estimating breach hydrographs. Using

speculative hydrograph as inputs to our models would simply introduce further uncertainties into our inundation maps. To underline this problem, we added the following statement to section 5.1 Inundation Modelling: “While the geomorphic setting caters to numerous potential flood-water sources and generating mechanisms, it lacks any evidence of initial breach characteristics. Yet these unknown parameters are essential for the empirical estimation of hydrographs that are required in models of unsteady flow; hence we restricted our scenario simulations to one-dimensional steady flow.”

*Specific Comment #3:*

L126-127: this is not clear – did you use your field cross-profiles to enhance (manipulate) ALOS DEM? Or how these two are integrated in the study? Please provide more details on your methodology

We changed LL126-129 as follows:

“Geometric data for our HEC-RAS runs were mainly derived from the commercial ALOS 3D digital elevation model (AW3D DEM), which has a vertical and horizontal resolution of <5 m and was projected to UTM Zone 44N (Fig. 2). We also acquired field data with a TruPulse 360 laser range finder and a Garmin eTrex handheld GPS during two campaigns in October of 2016 and 2019. We used these field data to correct some of the 572 DEM-derived channel cross-sections of the Seti Khola and its major tributaries, especially in the narrow gorges.”

*Specific Comment #4:*

L138-146: please consider summarizing these LC classes in table rather than in the text

We thank the referee for this suggestion and accordingly summarised the information on LC and LU classes formerly provided in LL138-146 in a new table.

*Specific Comment #5:*

L156-158: this is confusing; why don't you name the hazard classes according to the peak discharge?

Please also refer to our replies to Specific Comment Table 1 and Specific Comment Fig. 8.

We underline the difference between total areas covered by a given peak discharge scenario and our definition of hazard classes by expanding this paragraph as follows: “We used a geospatial overlay of our modelled flood inundation boundaries with the LULC data to assess on a semi-quantitative basis the likely impacts of ten peak discharge scenarios. We defined ten flood hazard classes by assigning areas and objects of the smallest flood scenario ( $Q_p = 1,000 \text{ m}^3 \text{ s}^{-1}$ ) to the highest-hazard class (HC) 10. Conversely, the lowest-hazard class 1 is attributed to areas and objects that would be inundated by the largest floods only ( $Q_p = 10,000 \text{ m}^3 \text{ s}^{-1}$ ). In contrast to the total area flooded by a given scenario, these hazard classes do not overlap but label the extent, which a specific scenario covers in contrast to the next lower peak discharge scenario. Hence, HC1 defines the areas and objects that

are potentially impacted by a flood with  $Q_p \geq 10,000 \text{ m}^3 \text{ s}^{-1}$ , whereas HC10 defines areas and objects that would be inundated by a flood with  $Q_p \geq 1,000 \text{ m}^3 \text{ s}^{-1}$ .”

*Specific Comment #6:*

L164-165: it would be good to map sediment extent also before the 2012 event, so you could display the change of sediment extent associated with the 2012 flood in your Fig. 3

We thank the referee for this suggestion. We added the sediment extents mapped from RapidEye satellite imagery acquired in March 2012 (22/03/2012) to Figure 3.

*Specific Comment #7:*

L171-172: simulated peak discharge in Kharapani is 3,700 m<sup>3</sup>/s, but on L41 you mentioned peak discharge 8,400 m<sup>3</sup>/s; please comment on this discrepancy

The peak discharge of 3,700 m<sup>3</sup> s<sup>-1</sup> mentioned in LL171-172 is the result of our model calibration based on sediment traces (also see our replies to Specific Comment #1 and Referee #2's General Comment #7 and their Specific Comment #4) while the peak discharge of 8,400 m<sup>3</sup> s<sup>-1</sup> cited in LL42 of the introduction was empirically estimated by Oi et al. (2014).

*Specific Comment #8:*

L282: ok, here you mention that you manipulated the DEM – please provide more details in the methods section

Please refer to our reply to Specific Comment #3.

*Specific Comment #9:*

L289-290: ok, here is the possible answer to geometric clusters, but would that really be captured by HEC-RAS in this way (can it capture subsurface drainage in this mode)?

Indeed, subsurface drainage is not modelled in our approach as we had stated in LL291-293 originally: “Modelling the groundwater flow in these potential karst structures is beyond the scope of this study and would require hydrological details that remain largely unresolved. We thus modelled flood flows for an idealized gorge geometry informed by DEM and field data.” Thus, we describe these locations of flooding in low-lying areas as **artefacts** in the model and explicitly state that: “Hence, interpretation of these model artefacts has to be handled with care.” (LL293). As water flow is modelled step-wise from one cross-section to the next, these artefacts potentially occur at cross-sections where the idealised gorge geometry does not capture (or at least underestimates) the available cross-sectional area of flow in the subsurface. This resulting “overspill” of the simulated flow to low-lying areas of the cross-section outside of the idealised gorge produces the model inundation artefacts. Karst features including caves and sinkholes occur in this central part of the

valley, were they are linked to the calcareous deposits of the Ghachok Formation (Fort, 2010; Rimal et al., 2018). We argue that unknown subsurface karst features might cause mismatches in cross-sectional flow area between our idealised model geometry and subsurface conditions. This problem is stated in LL288-291: “Our HEC-RAS simulations also show apparent flooding in places that are likely artefacts of the poorly resolved geometry of several narrow gorges and some subsurface drainage (Fig. 4). Sinkholes and caves in the Ghachok Formation may route some of the discharge of the Seti Khola below the surface, especially in urban areas (Fort, 2010; Rimal et al., 2015; Stolle et al., 2019)”. However, we **do not** suggest that the location of the model artefacts in our inundation maps highlights unknown subsurface drainage paths, which still await geotechnical mapping. We further stress this by changing the text passage following LL296 of the original manuscript version: “We thus modelled flood flows for an idealized gorge geometry informed by DEM and field data. Hence, model artefacts potentially occur at cross-sections where this idealised gorge geometry does not capture (or underestimates) subsurface flow; hence, interpretations of the resulting highly localised inundation areas have to be handled with care.”

*Specific Comment #10:*

L337: the recommendations outlined here are very general (probably applicable anywhere) and not really providing a solution for the maintenance failure issue with the previous EW system; moreover, they are in detail elaborated by Thapa et al. (2022); I suggest revision or removal

We altered the text in LL343ff accordingly: “Thapa et al. (2022) pointed out that existing evacuation routes from Yamdi and Kaseri settlements towards higher ground are inadequate and outlined several structural (e.g. river embankment) and non-structural (e.g. evacuation rehearsal drills, population relocation) mitigation measures. The authors proposed to install weather and hydrological stations and to transmit early warnings via mobile-phone, however, their flood response strategy strictly focuses on urban areas in Pokhara’s north-west. We argue, that a regularly maintained warning system might want to provide full coverage of all settlements along the Seti Khola’s course through the Pokhara valley – including rural settlements and exposed infrastructure in the northern valley. The May 2012 flood also demonstrated that such flash floods can travel fast in the steep headwaters of the Seti Khola (Kargel et al., 2013; Oi et al., 2014). Stream gauges and monitoring stations may need to be located further upstream than presently implemented, ideally close to the outlet of Sabche Cirque to maximise warning times for downstream communities. Complementing Thapa et al.’s (2022) proposal for early-warning strategies in the downstream reaches, we argue that a special focus should be laid on monitoring potentially hazardous developments in the Seti Khola’s headwaters. Ideally, continued remote monitoring of the Sabche Cirque using optical and SAR satellite data acquired at short repeat rates afforded via the Sentinel and Planet platforms might further assist early warning while ground movement and deformations of the cirque’s walls, surge-phases of the Sabche glacier, and lake formation might be tell-tale warning signs (Grebby et al., 2021; Hermle et al., 2021; Kirschbaum et al., 2019; Quincey et al., 2005). Based on the descriptions by Zhang and Wang (2022) of mitigation efforts of outburst hazard from Lake Cirenmaco, China, monitoring on the ground could include the real-time transmission of optical and thermal data, captured by 360° cameras, to a round-the-clock-operating data processing centre. Yet, the potential cloudiness of this area together with increasing pollution may constrain visual monitoring. Urban planning does not seem a priority for the local government and authorities (Gurung et al., 2021):

instead of relocating people from the vulnerable informal settlements (Yamdi and Kaseri) to safer places, the government and local authorities rather seem to have encouraged people to live in the floodplain by providing them basic amenities (drinking water, electricity, access road) and land owner certificates, thus letting people to live in the riverbanks and flood plains permanently (Gurung et al., 2021).”

### Specific Comments – Tables

#### *Specific Comment Table 1:*

it is a little mystery why there is a fluctuation (not gradual increase) in exposed areas for some of the LULC classes (for instance developed-medium: 153,446 m<sup>2</sup> for HC1; 30,214 m<sup>2</sup> for HC5; 50,432 m<sup>2</sup> for HC6; 18,408 m<sup>2</sup> for HC8 and 49,981 for HC10); in other words – why is the impact area of certain LULC not always the highest for the largest peak discharge scenario? Or does it show a difference to the previous peak discharge scenario (hazard class)? Please clarify.

Please also refer to our reply to Specific Comment Fig. 8.

To better clarify the definition of our hazard classes, we added the following explanation to section 3.4: “We used a geospatial overlay of our modelled flood inundation boundaries with the LULC data to assess on a semi-quantitative basis the likely impacts of ten peak discharge scenarios. We defined ten flood hazard classes by assigning areas and objects of the smallest flood scenario ( $Q_p = 1,000 \text{ m}^3 \text{ s}^{-1}$ ) to the highest-hazard class (HC) 10. Conversely, the lowest-hazard class 1 is attributed to areas and objects that would be inundated by the largest floods only ( $Q_p = 10,000 \text{ m}^3 \text{ s}^{-1}$ ). In contrast to the total area flooded by a given scenario, these hazard classes do not overlap but label the extent, which a specific scenario covers in contrast to the next lower peak discharge scenario. Hence, HC1 defines the areas and objects that are potentially impacted by a flood with  $Q_p \geq 10,000 \text{ m}^3 \text{ s}^{-1}$ , whereas HC10 defines areas and objects that would be inundated by a flood with  $Q_p \geq 1,000 \text{ m}^3 \text{ s}^{-1}$ .”

To stress this in Table 1, we also added “>=” to its left column (e.g. HC8,  $Q_p \geq 3,000 \text{ m}^3 \text{ s}^{-1}$ ).

#### *Specific Comment Table 2:*

please unify the naming of your hazard classes with the rest of the manuscript

We thank the referee for this comment and adjusted the hazard class naming in the first column accordingly.

### Specific Comments – Figures

#### *Specific Comment Fig. 1:*

please consider displaying topography (basic contour lines or cross-profiles at selected locations) in this figure

We thank the referee for this suggestion and opted to add contour lines to our Figure 1.

*Specific Comment Fig. 6:*

please show the complete SE bank in this figure (so the flood extents do not terminate in the air)

We thank the referee for this suggestion and extended the cross-section shown in Figure 6 accordingly.

*Specific Comment Fig. 7:*

the inset map seems to display something different to the main map (or some LULC classes are not shown for some reason (?))

In the original Figure 7's insert only LULC cover categorized in a hazard class is shown while areas with "no hazard" remain white. We understand how this might be confusing. Also following the recommendations of Referee #2 regarding this figure, we changed its design for a better understanding and also match the insert with the main map.

*Specific Comment Fig. 8:*

this is confusing and hard to read and I'm not sure this is the correct graph type to be used; what is the link between this graph and Table 1? What is the actual meaning of the area on y axis (part (a))? For instance, when I sum up the areas for exposed grassland and all scenarios (Table 1), the total area is something about 2,4 km<sup>2</sup>; here the total area of exposed grassland approx. 17 km<sup>2</sup> which is confusing; the largest peak discharge scenario is shown at the bottom (I would expect starting with the 1,000 m<sup>3</sup>/s, so it can be deduced how much area is exposed for individual scenarios);

Figure 8 shows the **total area** of a given LULC class that is covered by inundation of a **given peak discharge scenario**. Hence, areas covered already in the 1,000 m<sup>3</sup>/s scenario will also be covered by the scenarios with higher magnitudes. Values for the hazard class areas listed in Table 1 solely depict the area of the zone that this specific scenario covers in contrast to the next smaller peak discharge scenario (area of **difference** between the scenarios' inundation limits). In contrast to total inundated areas covered by a certain peak discharge scenario, HC zones do not overlap. For example, HC 4 defines the zone, which will potentially not be affected by floods with peak discharges smaller than 7,000 m<sup>3</sup> s<sup>-1</sup> but by floods with a peak discharge of 7,000 m<sup>3</sup> s<sup>-1</sup> and larger.

We now better underline this difference in definition between total areas covered in a given peak discharge scenario and the hazard class zones in 3.4: "We used a geospatial overlay of our modelled flood inundation boundaries with the LULC data to assess on a semi-quantitative basis the likely impacts of ten peak discharge scenarios. We defined ten flood hazard classes by assigning areas and objects of the smallest flood scenario ( $Q_p = 1,000 \text{ m}^3 \text{ s}^{-1}$ ) to the highest-hazard class (HC) 10. Conversely, the lowest-hazard class 1 is attributed to areas and objects that would be inundated by the largest floods only ( $Q_p = 10,000 \text{ m}^3 \text{ s}^{-1}$ ). In contrast to the total area flooded by a given scenario, these hazard classes do not overlap but label the extent, which a specific scenario covers in contrast



to the next lower peak discharge scenario. Hence, HC1 defines the areas and objects that are potentially impacted by a flood with  $Q_p \geq 10,000 \text{ m}^3 \text{ s}^{-1}$ , whereas HC10 defines areas and objects that would be inundated by a flood with  $Q_p \geq 1,000 \text{ m}^3 \text{ s}^{-1}$ ."

*Specific Comment Fig. 10 and 11:*

Figs. 10 and 11: what are those strange geometric linear clusters of buildings exposed to hazard class 1-3? What about that cluster located far (and disconnected) from the river?

These clusters are potential model artefacts and, hence, we refer the referee to our reply to Specific Comment #9.

## References

- Basnet, K. and Acharya, D.: Flood Analysis at Ramghat, Pokhara, Nepal Using HEC-RAS, *Tech. J.*, 1(1), 41–53, doi:10.3126/tj.v1i1.27591, 2019.
- Fort, M.: Sporadic morphogenesis in a continental subduction setting: an example from the Annapurna Range, Nepal Himalaya., *Zeitschrift für Geomorphol. Suppl.*, 63, 9–36, 1987.
- Fort, M.: The Pokhara Valley: A product of a natural catastrophe, in *Geomorphological Landscapes of the World*, edited by P. Migon, pp. 265–274, Springer Science+Business Media B. V., 2010.
- Grandin, R., Doin, M. P., Bollinger, L., Pinel-Puysségur, B., Ducret, G., Jolivet, R. and Sapkota, S. N.: Long-term growth of the Himalaya inferred from interseismic InSAR measurement, *Geology*, 40(12), 1059–1062, doi:10.1130/G33154.1, 2012.
- Grebby, S., Sowter, A., Gee, D., Athab, A., De la Barrera-Bautista, B., Girindran, R. and Marsh, S.: Remote monitoring of ground motion hazards in high mountain terrain using InSAR: A case study of the Lake Sarez area, Tajikistan, *Appl. Sci.*, 11(18), doi:10.3390/app11188738, 2021.
- Gurung, D. R., Maharjan, S. B., Khanal, N. R., Joshi, G. and Murthy, M. S. R.: Nepal disaster report 2015, Kathmandu., 2015.
- Gurung, N., Fort, M., Bell, R., Arnaud-Fassetta, G. and Maharjan, N. R.: Hydro-torrential hazard vs. anthropogenic activities along the Seti valley, Kaski, Nepal: Assessment and recommendations from a risk perspective, *J. Nepal Geol. Soc.*, 62, 58–87, doi:10.3126/jngs.v62i0.38695, 2021.
- Hanisch, J., Koirala, A. and Bhandary, N. P.: The Pokhara May 5th flood disaster: a last warning sign sent by nature?, *J. Nepal Geol. Soc.*, 46, 1–10, 2013.
- Hermle, D., Keuschnig, M., Hartmeyer, I., Delleske, R. and Krautblatter, M.: Timely prediction potential of landslide early warning systems with multispectral remote sensing: A conceptual approach tested in the Sattelkar, Austria, *Nat. Hazards Earth Syst. Sci.*, 21(9), 2753–2772, doi:10.5194/nhess-21-2753-2021, 2021.
- Kargel, J. S., Paudel, L., Leonard, G., Regmi, D., Joshi, S., Poudel, K., Thapa, B., Watanabe, T. and Fort, M.: Causes and human impacts of the Seti River (Nepal) disaster of 2012, in *Glacial Flooding & Disaster Risk Management Knowledge Exchange and Field Training; High Mountains Adaptation Partnership: Huaraz, Peru*, pp. 1–11, Huaraz., 2013.
- Kirschbaum, D., Watson, C. S., Rounce, D. R., Shugar, D. H., Kargel, J. S., Haritashya, U. K., Amatya, P., Shean, D., Anderson, E. R. and Jo, M.: The State of Remote Sensing Capabilities of Cascading Hazards Over High Mountain Asia, *Front. Earth Sci.*, 7, 1–25, doi:10.3389/feart.2019.00197, 2019.
- Lovell, A. M., Carr, J. R. and Stokes, C. R.: Topographic controls on the surging behaviour of Sabche Glacier, Nepal (1967 to 2017), *Remote Sens. Environ.*, 210, 434–443, doi:10.1016/j.rse.2018.03.036, 2018.
- Oi, H., Higaki, D., Yagi, H., Usuki, N. and Yoshino, K.: Survey Report on the Seti River Flood, Nepal (May 5, 2012), Sabo Frontier Foundation, Tokyo., 2012.
- Oi, H., Higaki, D., Yagi, H., Usuki, N. and Yoshino, K.: Report of the investigation of the flood disaster that occurred on May 5, 2012 along the Seti River in Nepal, *Int. J. Eros. Control Eng.*, 7(4), 111–117, doi:10.13101/ijece.7.111, 2014.
- Pandey, V. K., Kumar, R., Singh, R., Kumar, R., Rai, S. C., Singh, R. P., Tripathi, A. K., Soni, V. K., Ali, S. N., Tamang, D. and Latief, S. U.: Catastrophic ice-debris flow in the Rishiganga River, Chamoli,

Uttarakhand (India), *Geomatics, Nat. Hazards Risk*, 13(1), 289–309, doi:10.1080/19475705.2021.2023661, 2022.

Petley, D.: Melamchi: a landslide dam break flood in Nepal last week, *Landslide Blog - AGU Blogosph.* [online] Available from: <https://blogs.agu.org/landslideblog/2021/06/21/melamchi-a-landslide-dam-break-flood-in-nepal-last-week/> (Accessed 16 July 2021), 2021.

Quincey, D. J., Lucas, R. M., Richardson, S. D., Glasser, N. F., Hambrey, M. J. and Reynolds, J. M.: Optical remote sensing techniques in high-mountain environments: Application to glacial hazards, *Prog. Phys. Geogr.*, 29(4), 475–505, doi:10.1191/0309133305pp456ra, 2005.

Rimal, B., Zhang, L., Keshtkar, H., Sun, X. and Rijal, S.: Quantifying the spatiotemporal pattern of urban expansion and hazard and risk area identification in the Kaski District of Nepal, *Land*, 7(37), 1–22, doi:10.3390/land7010037, 2018.

SANDRP: Explained: Seti River floods in May 2012, Nepal- A chain of events, starting at 25,000 feet!, [online] Available from: <https://sandrp.in/2014/01/26/explained-seti-river-floods-in-may-2012-nepal-a-chain-of-events-starting-at-25000-feet/> (Accessed 18 March 2021), 2014.

Schwanghart, W., Bernhardt, A., Stolle, A., Hoelzmann, P., Adhikari, B. R., Andermann, C., Tofelde, S., Merchel, S., Rugel, G., Fort, M. and Korup, O.: Repeated catastrophic valley infill following medieval earthquakes in the Nepal Himalaya, *Science*, 351(6269), 147–150, doi:10.1126/science.aac9865, 2016.

Shugar, D. H., Jacquemart, M., Shean, D., Bhushan, S., Upadhyay, K., Sattar, A., Schwanghart, W., McBride, S., de Vries, M. V. W., Mergili, M., Emmer, A., Deschamps-Berger, C., McDonnell, M., Bhambri, R., Allen, S. K., Berthier, E., Carrivick, J. L., Clague, J. J., Dokukin, M., Dunning, S. A., Frey, H., Gascoïn, S., Haritashya, U. K., Huggel, C., Kääb, A., Kargel, J. S., Kavanaugh, J. L., Lacroix, P., Petley, D., Rupper, S., Azam, M. F., Cook, S. J., Dimri, A. P., Eriksson, M., Farinotti, D., Fiddes, J., Gnyawali, K. R., Harrison, S., Jha, M., Koppes, M., Kumar, A., Leinss, S., Majeed, U., Mal, S., Muhuri, A., Noetzli, J., Paul, F., Rashid, I., Sain, K., Steiner, J., Ugalde, F., Watson, C. S. and Westoby, M. J.: A massive rock and ice avalanche caused the 2021 disaster at Chamoli, Indian Himalaya, *Science*, 373(6552), 300–306, doi:10.1126/science.abh4455, 2021.

Stolle, A., Bernhardt, A., Schwanghart, W., Hoelzmann, P., Adhikari, B. R., Fort, M. and Korup, O.: Catastrophic valley fills record large Himalayan earthquakes, Pokhara, Nepal, *Quat. Sci. Rev.*, 177, 88–103, doi:10.1016/j.quascirev.2017.10.015, 2017.

Talchabhadel, R., Karki, R., Thapa, B. R., Maharjan, M. and Parajuli, B.: Spatio-temporal variability of extreme precipitation in Nepal, *Int. J. Climatol.*, 38(11), 4296–4313, doi:10.1002/joc.5669, 2018.

Thapa, B., Watanabe, T. and Regmi, D.: Flood Assessment and Identification of Emergency Evacuation Routes in Seti River Basin, Nepal, *Land*, 11(82), 1–33, doi:10.3390/land11010082, 2022.

Vuichard, D. and Zimmermann, M.: The 1985 Catastrophic Drainage of a Moraine-Dammed Lake, Khumbu Himal, Nepal: Cause and Consequences, *Mt. Res. Dev.*, 7(2), 91–110, doi:10.2307/3673305, 1987.

Wang, W., Zhang, T., Yao, T. and An, B.: Monitoring and early warning system of Cirenmaco glacial lake in the central Himalayas, *Int. J. Disaster Risk Reduct.*, 73, 1–12, doi:10.1016/j.ijdrr.2022.102914, 2022.

Zheng, G., Allen, S. K., Bao, A., Ballesteros-Cánovas, J. A., Huss, M., Zhang, G., Li, J., Yuan, Y., Jiang, L., Yu, T., Chen, W. and Stoffel, M.: Increasing risk of glacial lake outburst floods from future Third Pole deglaciation, *Nat. Clim. Chang.*, 11(5), 411–417, doi:10.1038/s41558-021-01028-3, 2021.
